# Supplementary figures and images for: 正負の数を利用するよさを実感させる指導 : 小中TT授業「仮平均の利用」の実践(第2分科会 数と式,II 中学校部会,第92回全国算数・数学教育研究(新潟)大会 第59回北陸四県数学教育研究(新潟)大会 平成22年度新潟県高等学校教育研究会数学部会 日本数学教育学会第92回総会)
Source: MDPI journal article supplement (doi:10.3390/microorganisms10112245), 2010-08-01

A

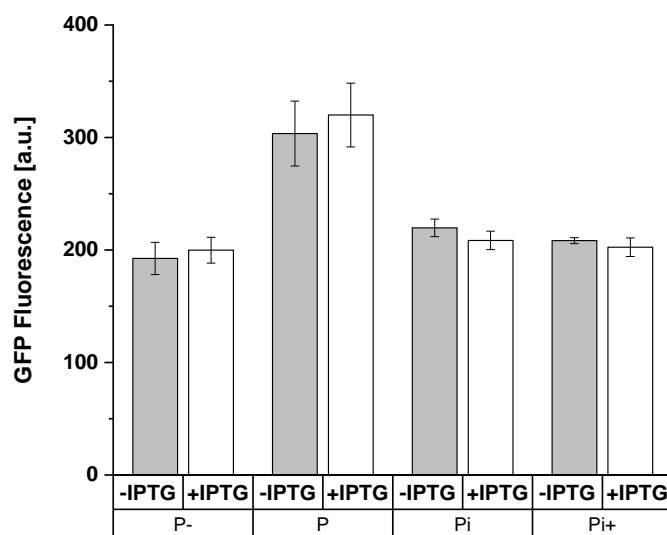

B

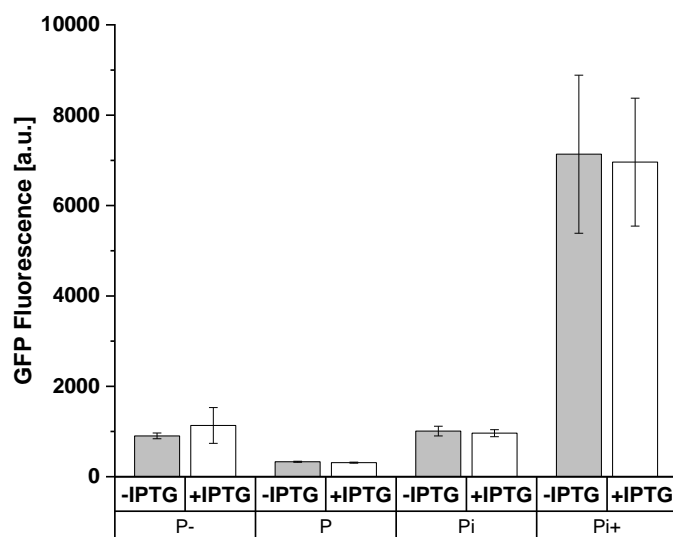

Figure S1

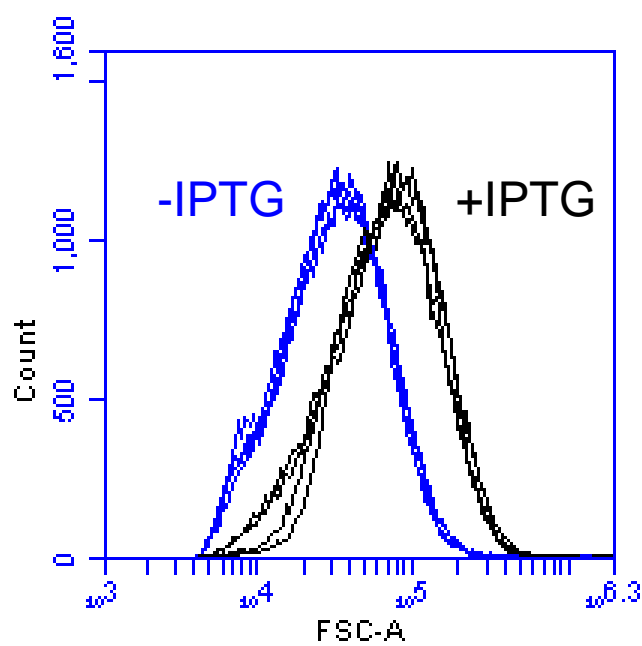

Figure S2

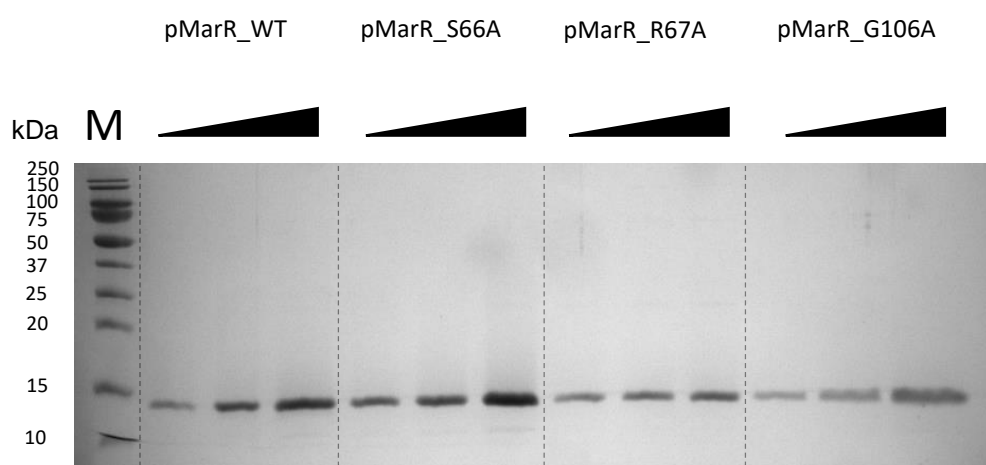

Figure S3

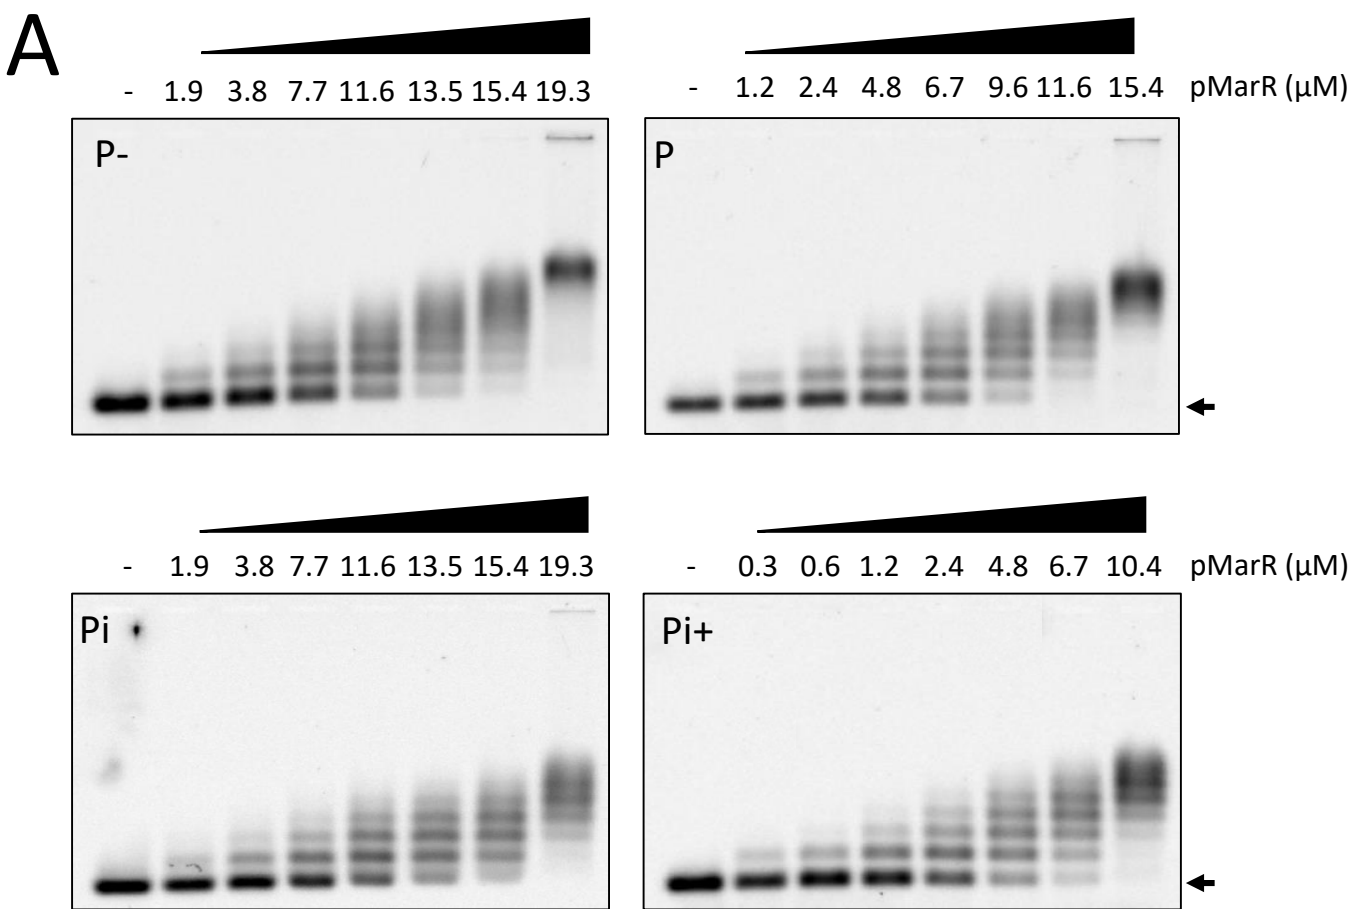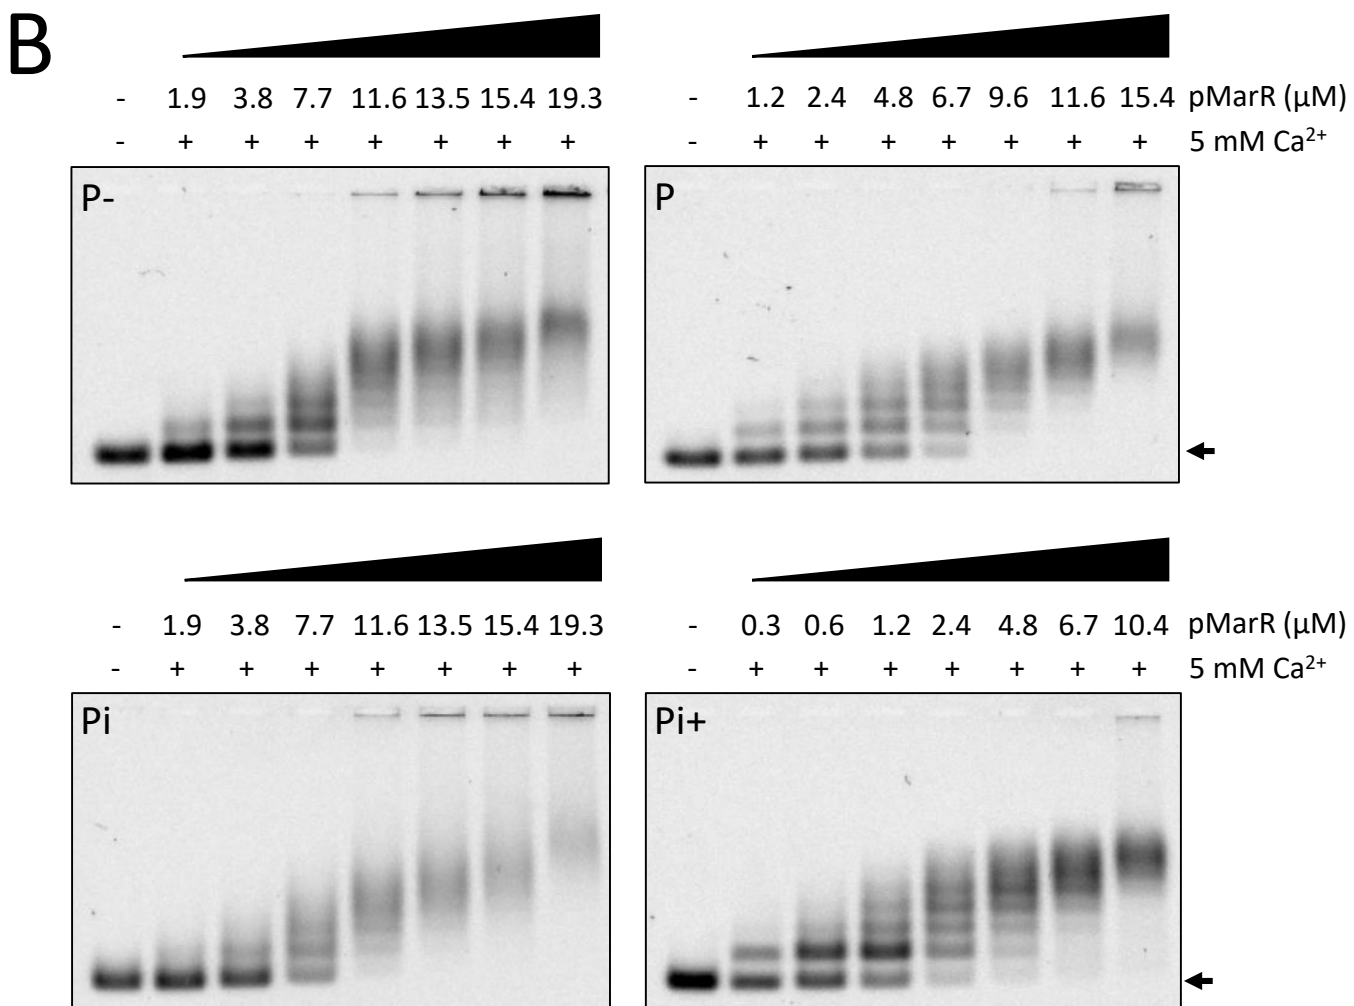

Figure S4

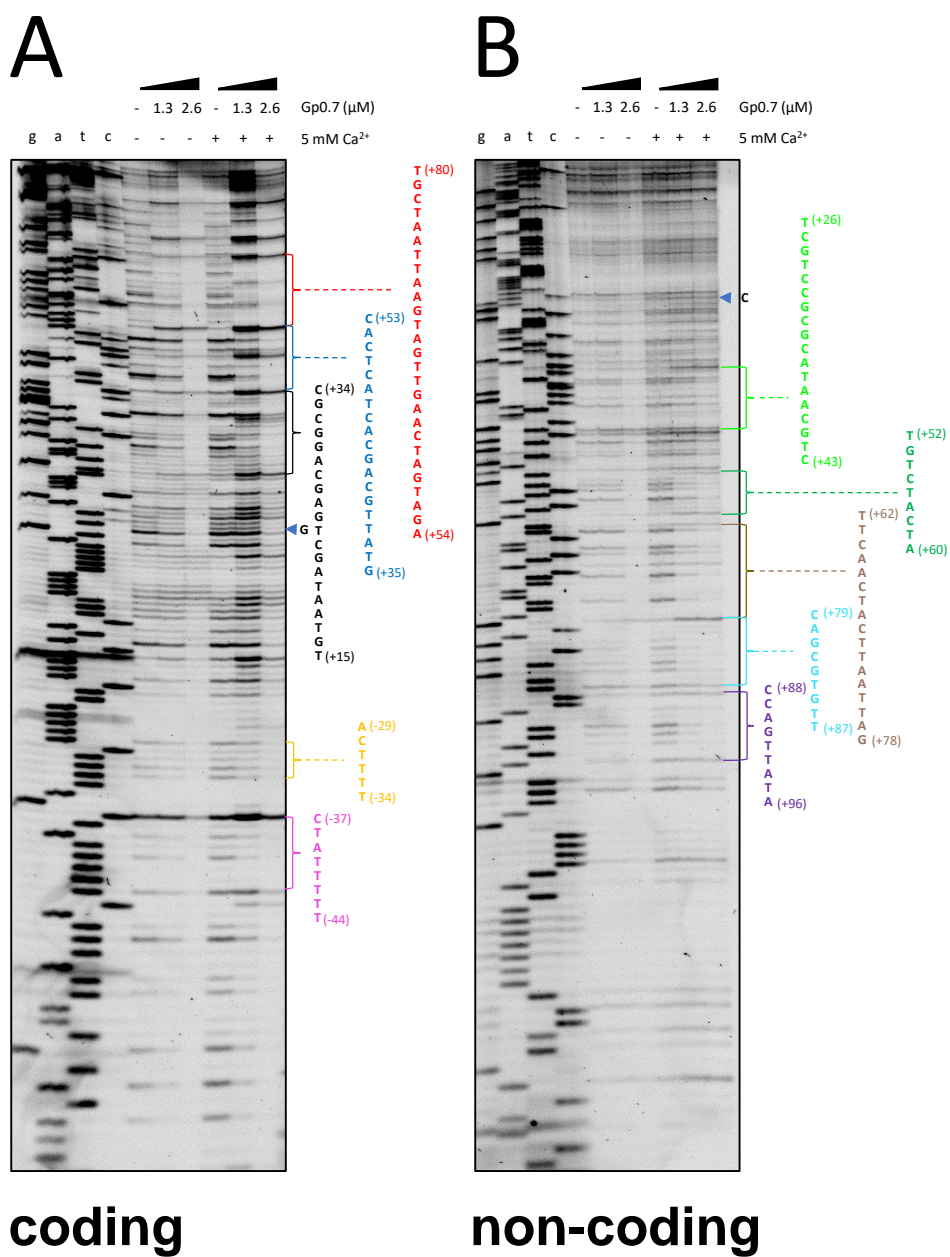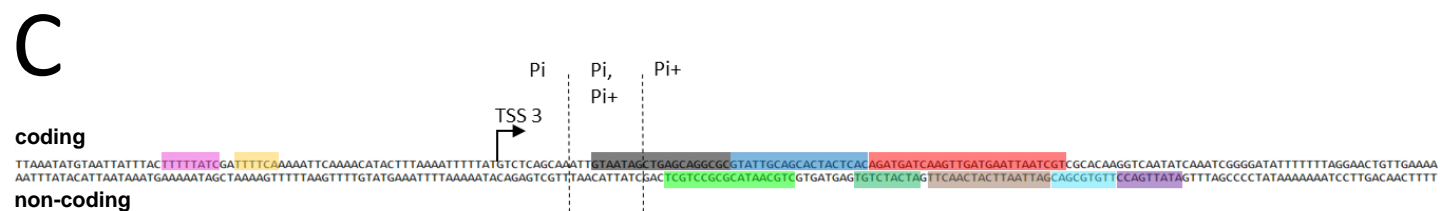

## Figure S5

# A

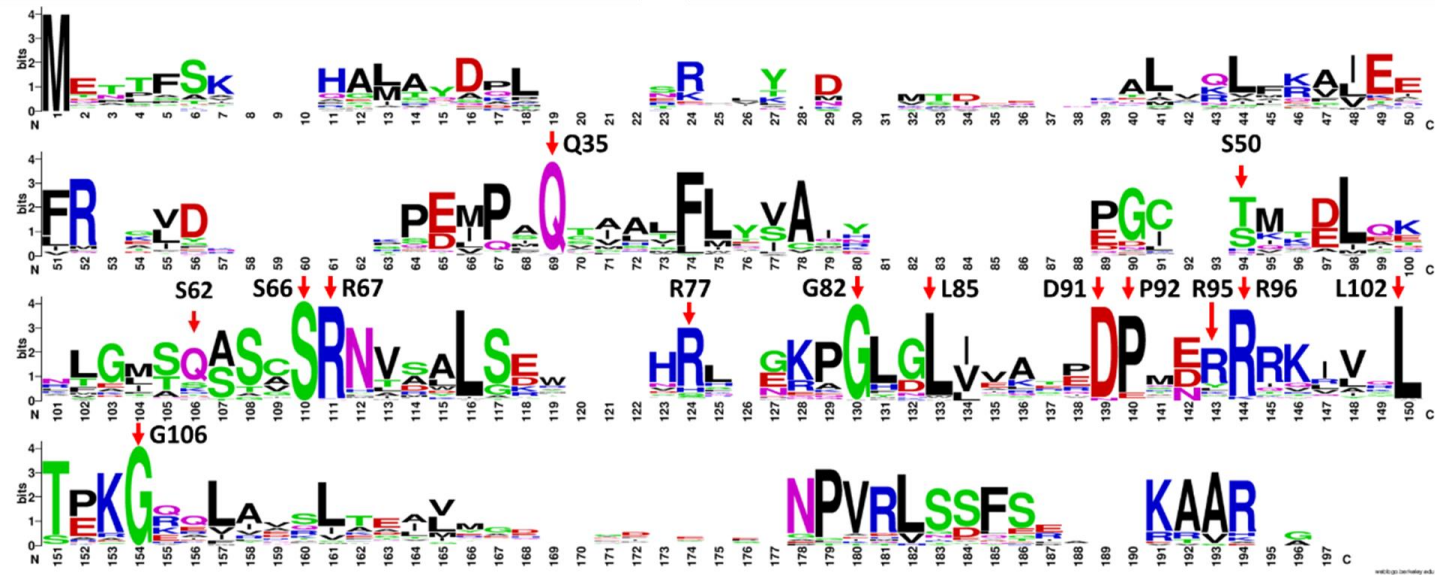

# B

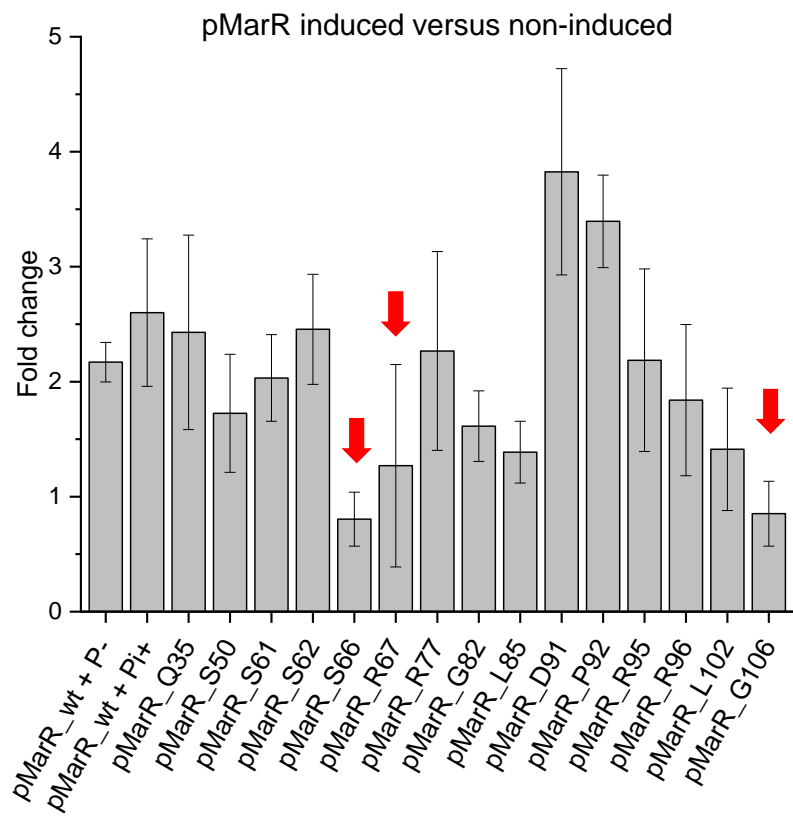

Figure S6

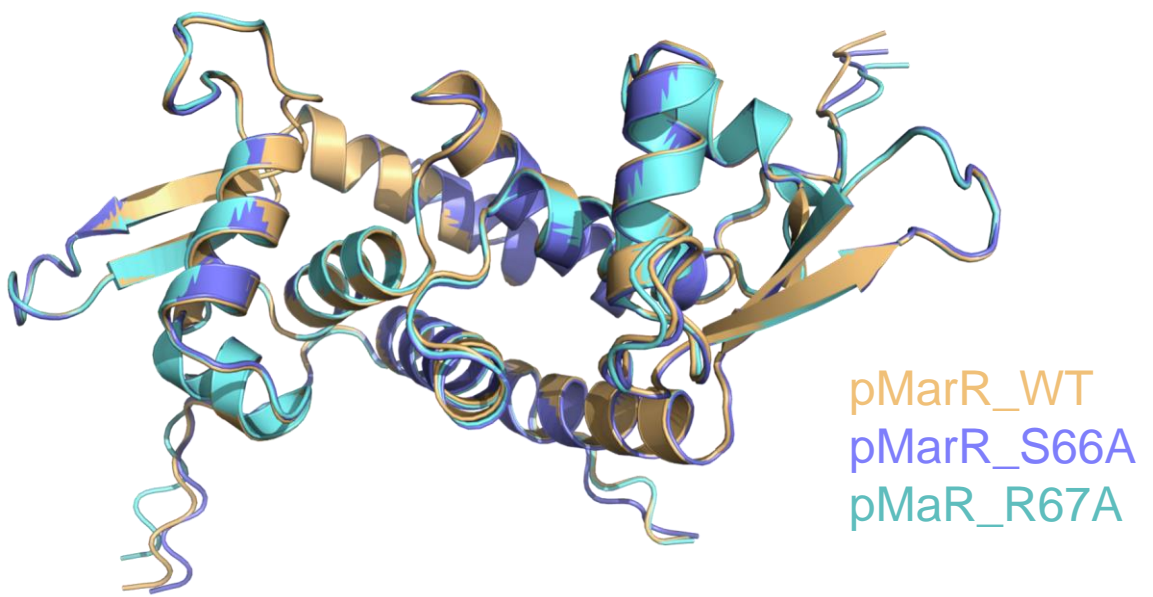

Figure S7

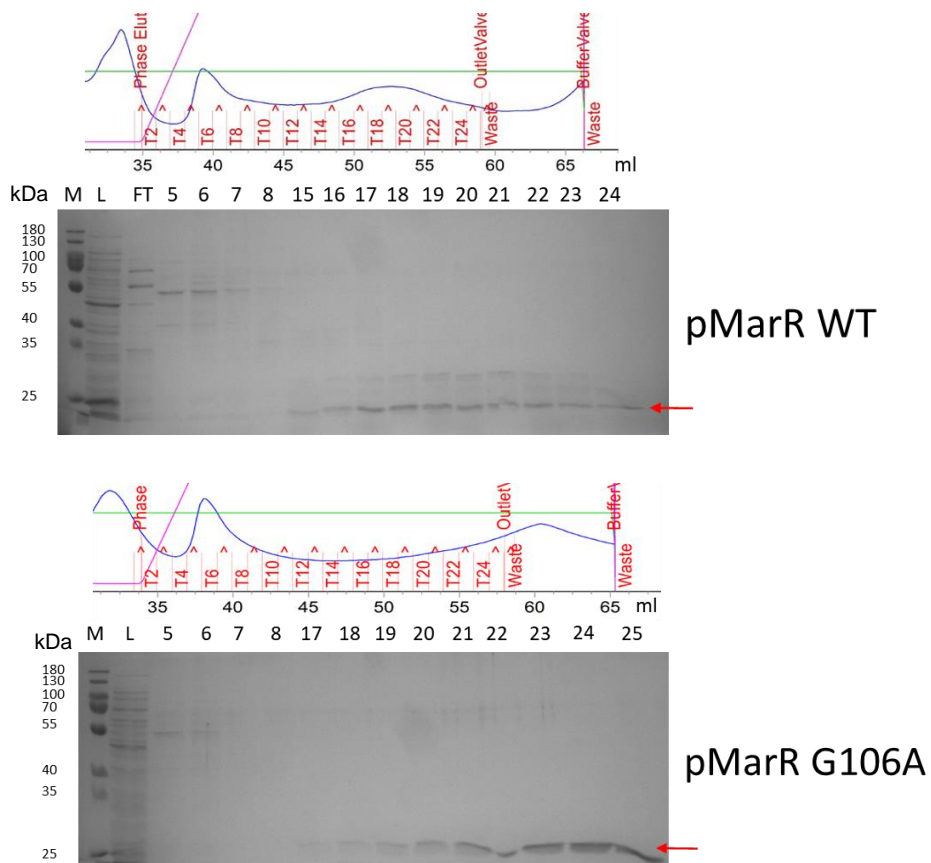

Figure S8



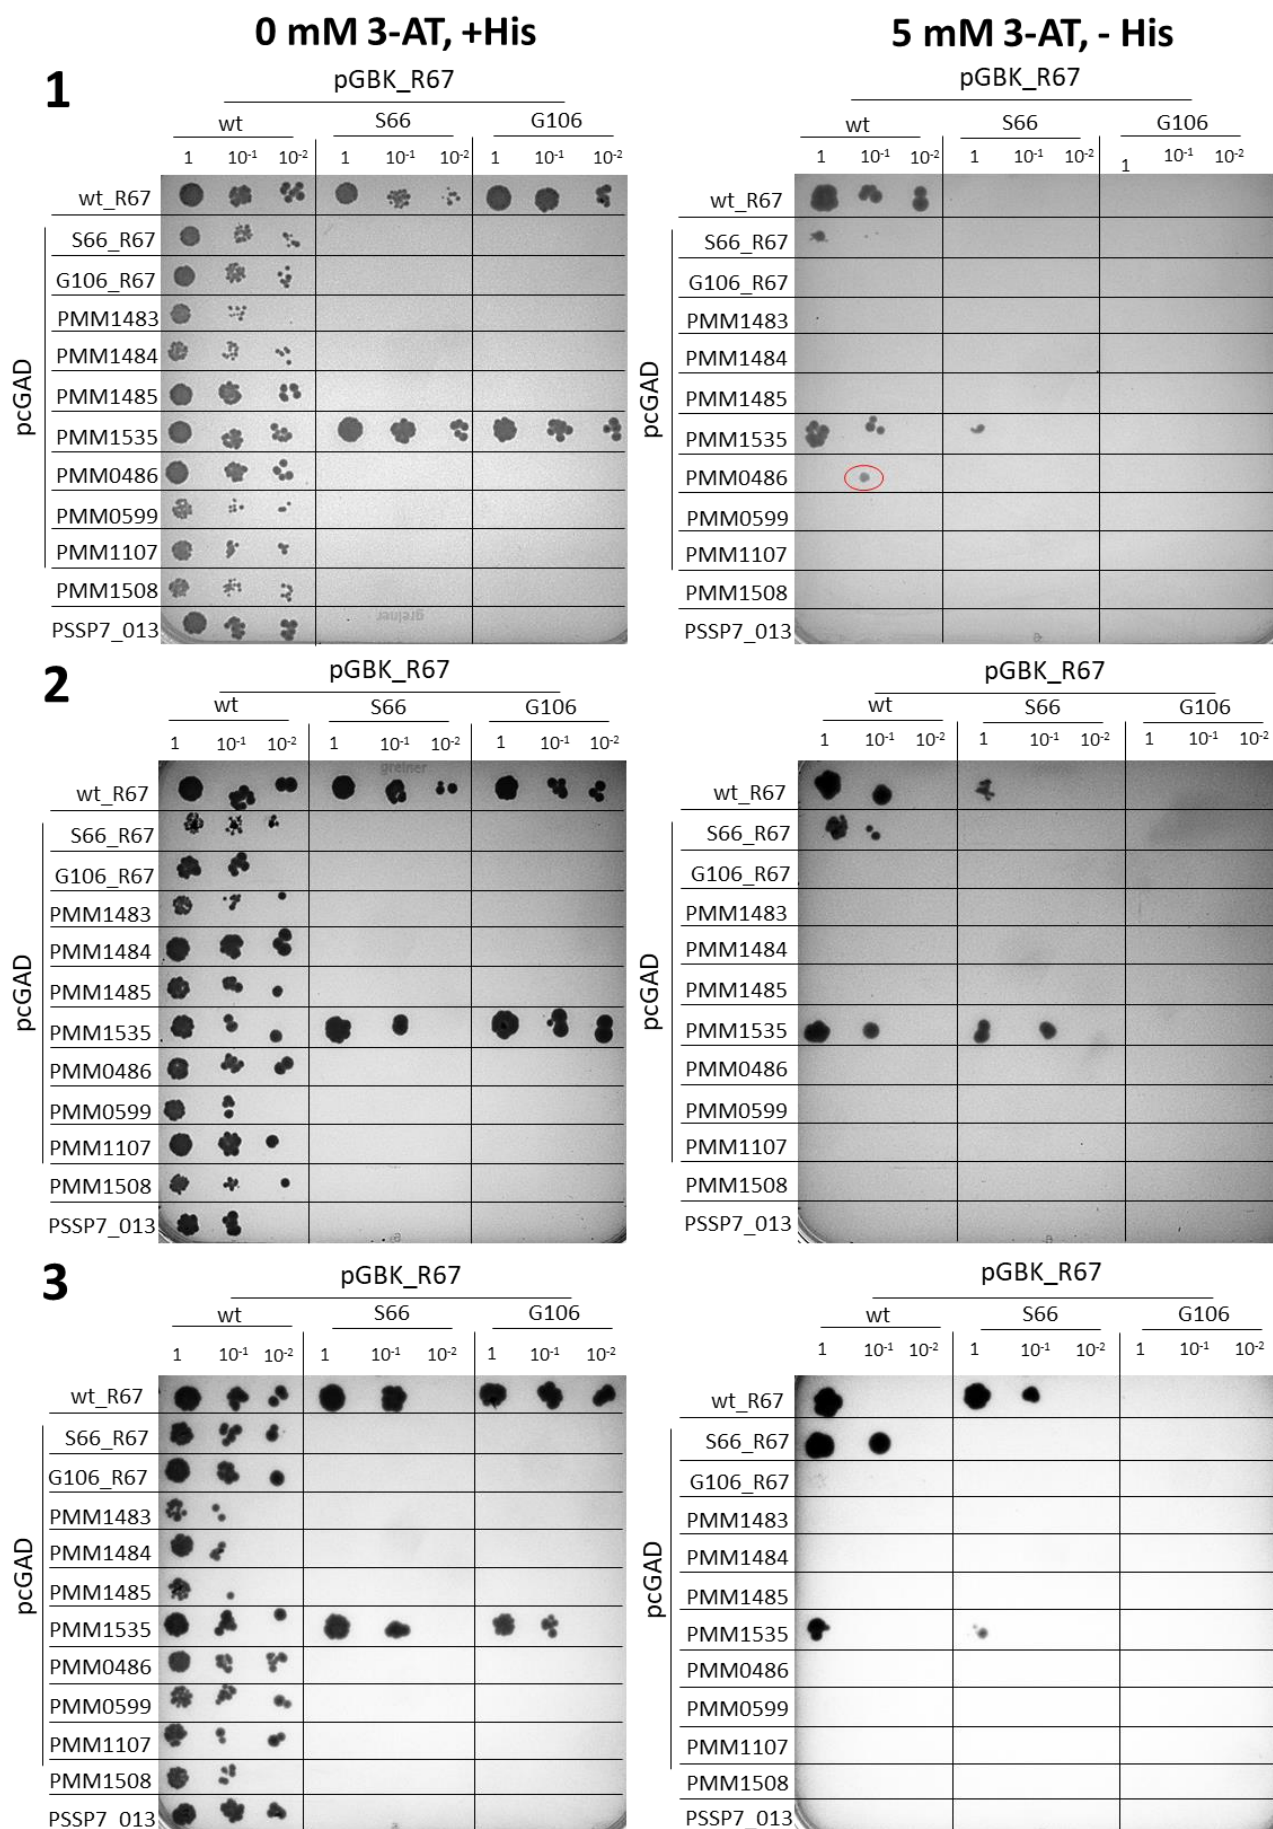

Figure S9

Supplement: s1 [file s1]
